# Supplementary material for: Dendroremediation Potential of Six Quercus Species to Polluted Soil in Historic Copper Mining Sites
Source: MDPI journal article supplement (doi:10.3390/f14010062), 2022-12-29
Supplement: s1 [file s1]

## **Supporting information**

### **Dendroremediation potential of six *Quercus* species to polluted soil in historic copper mining sites**

**Yini Cao<sup>1</sup>, Liangqian Yu<sup>2</sup>, Ning Dang<sup>1</sup>, Lixiang Sun<sup>3</sup>, Pingxuan Zhang<sup>3</sup>, Jiwu Cao<sup>2\*</sup>, Guangcai Chen<sup>1\*</sup>**

<sup>1</sup>Research Institute of Subtropical Forestry, Chinese Academy of Forestry, Hangzhou, Zhejiang 311400, China

<sup>2</sup>Central South University of Forestry and Technology, Changsha, Hunan 410004, China

<sup>3</sup>Tongling City state-owned forest farm, Tongling, Anhui 244000, China

\*Correspondence: Prof. & Dr. Guangcai Chen, Research Institute of Subtropical Forestry, Chinese Academy of Forestry, Hangzhou, 311400, China. E-mail: guangcaichen@sohu.com, gcchen@caf.ac.cn; Phone: + 86 571 63105079

Table S1 Plant height (cm), base stem diameter (mm) of six *Quercus* species planted in control, T1 and T2 before cultivation.

| Quercus species      | Treatments | Height (cm) | Stem diameter (mm) |
|----------------------|------------|-------------|--------------------|
| <i>Q. fabri</i>      | Control    | 66.3±2.1    | 4.70±0.17          |
|                      | T1         | 64.0±1.7    | 4.75±0.10          |
|                      | T2         | 63.3±1.5    | 4.29±0.22          |
| <i>Q. pagoda</i>     | Control    | 61.7±3.8    | 4.73±0.11          |
|                      | T1         | 63.0±2.6    | 4.78±0.19          |
|                      | T2         | 61.7±1.5    | 4.46±0.21          |
| <i>Q. phellos</i>    | Control    | 66.0±1.0    | 5.35±0.15          |
|                      | T1         | 66.7±1.5    | 5.36±0.09          |
|                      | T2         | 64.0±1.0    | 5.18±0.06          |
| <i>Q. nuttallii</i>  | Control    | 68.0±2.0    | 5.19±0.15          |
|                      | T1         | 66.0±1.0    | 5.57±0.19          |
|                      | T2         | 69.0±1.0    | 5.09±0.07          |
| <i>Q. acutissima</i> | Control    | 65.3±3.2    | 4.88±0.17          |
|                      | T1         | 66.0±3.0    | 4.77±0.15          |
|                      | T2         | 66.0±2.0    | 5.23±0.20          |
| <i>Q. virginiana</i> | Control    | 68.7±1.5    | 5.39±0.15          |
|                      | T1         | 67.0±1.7    | 5.22±0.07          |
|                      | T2         | 70.0±1.0    | 5.17±0.06          |

**Table S2 The recovery data for elemental analysis using inductively coupled plasma atomic emission spectrometry (ICP-AES)**

|          | CRM              | Cd        | Zn       | Pb       |
|----------|------------------|-----------|----------|----------|
| GB-07603 | Measured values  | 0.43±0.04 | 53.4±1.3 | 42.6±3.0 |
|          | Certified values | 0.38      | 55.1±4.2 | 47.2±3.0 |
|          | Recovery rate(%) | 113.29    | 97.07    | 90.56    |

**Table S3 AHP method for three criteria regardless of T1 and T2 treatments**

|                    | plant<br>growth | photosynthesis | metal accumulation<br>capacity | Weight | consistency<br>ratio |
|--------------------|-----------------|----------------|--------------------------------|--------|----------------------|
| Plant growth       | 1               | 1              | 2/3                            | 0.29   | 0.00                 |
| Photosynthesis     | 1               | 1              | 2/3                            | 0.29   |                      |
| Metal accumulation | 1 1/2           | 1 1/2          | 1                              | 0.43   |                      |

**Table S4 Plant height (cm), stem diameter (mm), leaf biomass and stem biomass (g, DW) of six *Quercus* species cultivated in control, T1 and T2 for 150 d**

| <i>Quercus</i> species | Treatments | Plant height | Stem diameter | Leaf biomass | Stem biomass |
|------------------------|------------|--------------|---------------|--------------|--------------|
| <i>Q. fabri</i>        | control    | 118±7.7      | 6.6±0.13      | 6.7±0.05     | 21.6±1.70    |
|                        | T1         | 104±4.9      | 5.5±0.04      | 2.1±0.36     | 12.2±2.60    |
|                        | T2         | 103±3.2      | 5.1±0.56      | 2.6±0.28     | 11.8±1.29    |
| <i>Q. pagoda</i>       | control    | 96±4.9       | 5.6±0.32      | 3.5±1.03     | 15.4±0.87    |
|                        | T1         | 93±5.5       | 5.3±0.19      | 1.6±0.27     | 11.0±1.66    |
|                        | T2         | 98±6.6       | 5.4±0.47      | 1.6±1.28     | 16.3±1.03    |
| <i>Q. phellos</i>      | control    | 118±13.3     | 6.9±1.65      | 10.5±0.48    | 43.3±0.99    |
|                        | T1         | 107±8.5      | 7.2±0.45      | 11.1±2.44    | 27.2±4.88    |
|                        | T2         | 103±3.8      | 7.7±0.43      | 7.3±0.02     | 30.2±5.61    |
| <i>Q. nuttallii</i>    | control    | 99±15.3      | 6.5±0.97      | 2.6±0.46     | 20.9±4.66    |
|                        | T1         | 110±3.5      | 7.5±0.20      | 4.8±1.59     | 25.5±5.52    |
|                        | T2         | 108±4.5      | 7.4±0.30      | 2.9±0.55     | 23.7±2.75    |
| <i>Q. acutissima</i>   | control    | 110±6.5      | 5.8±0.38      | 6.9±1.74     | 19.2±5.54    |
|                        | T1         | 109±9.3      | 5.8±0.61      | 7.2±2.03     | 16.2±3.18    |
|                        | T2         | 115±4.2      | 5.8±0.45      | 7.2±1.24     | 21.4±7.01    |
| <i>Q. virginiana</i>   | control    | 126±5.5      | 6.6±0.30      | 4.1±0.25     | 23.2±1.83    |
|                        | T1         | 107±12.9     | 7.1±0.99      | 6.0±0.43     | 19.7±3.53    |
|                        | T2         | 112±19.9     | 6.7±0.32      | 5.0±0.36     | 19.5±0.92    |
| Significances          | T          | ns           | ns            | **           | ***          |
|                        | S          | **           | **            | ****         | ****         |
|                        | T×S        | ns           | ns            | ****         | **           |

Data represent the mean of three replicates ± SD (n=3). *p* values of the two-way ANOVAs of soil treatments (T), oak species (S), and heir interactions (T×S) were also shown.

ns, not significant; \*,  $p \leq 0.05$ ; \*\*,  $p \leq 0.01$ ; \*\*\*,  $p \leq 0.001$ ; \*\*\*\*,  $p \leq 0.0001$

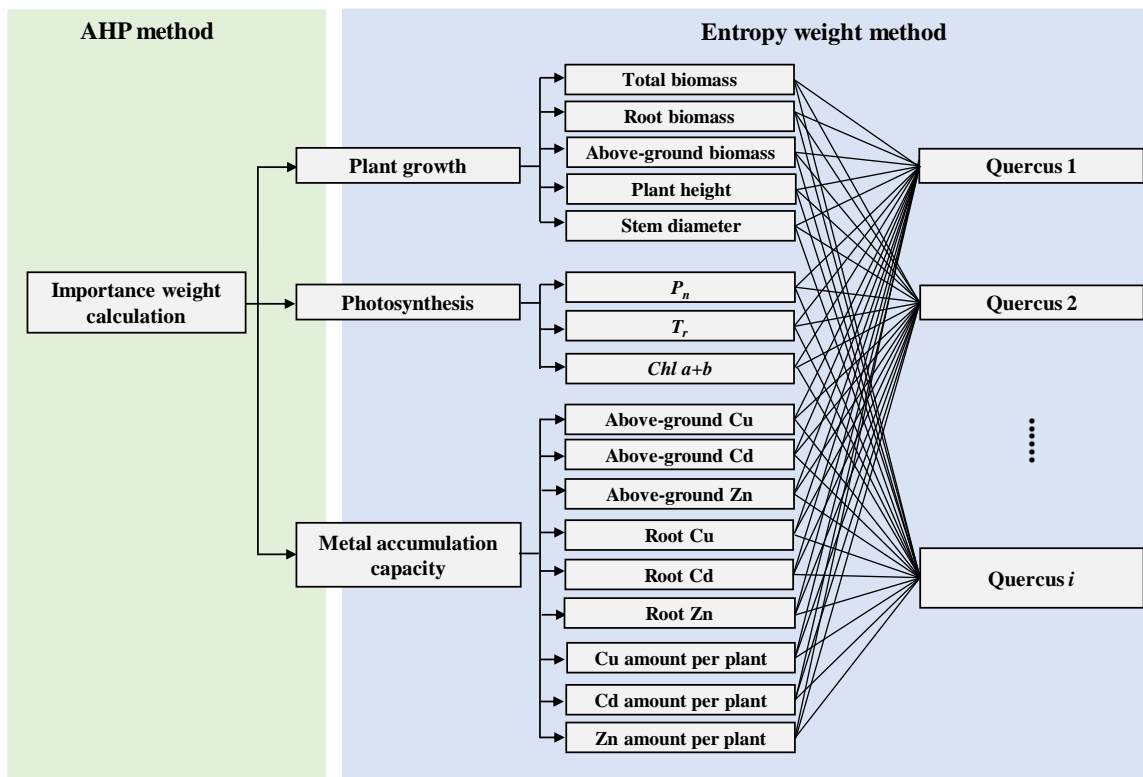

**Figure S1 The framework of AHP-EW method for calculating importance weights of phytoremediation potential**

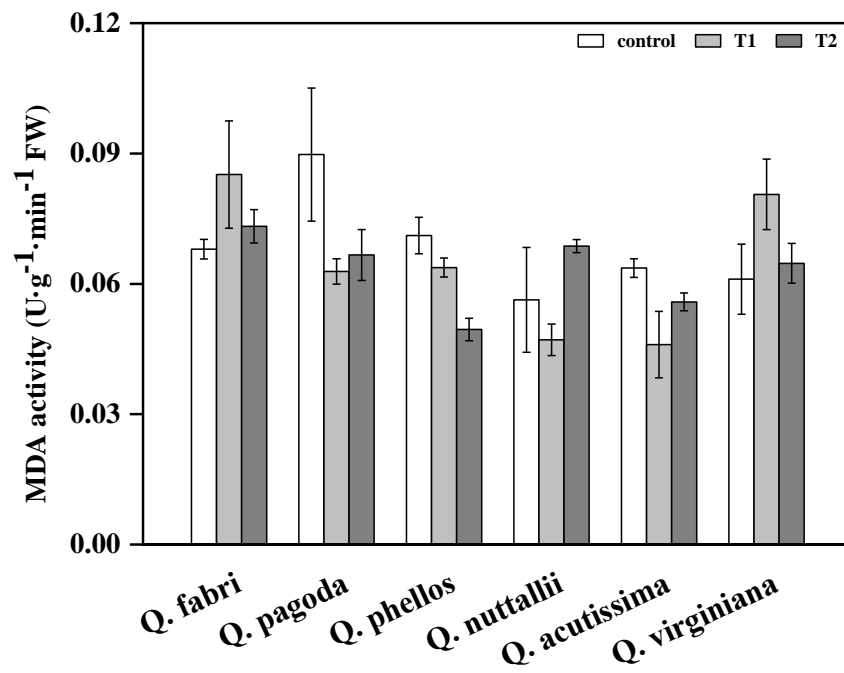

**Figure S2 Effects of different heavy metal contaminated soils on malonaldehyde (MDA) content in leaves of six *Quercus* species**
